# Supplementary material
Source: Springer Nature journal article supplement (https://www.springermedizin.de/resource/supplementary/12947_2014_543_MOESM4_ESM.pdf/9555986)

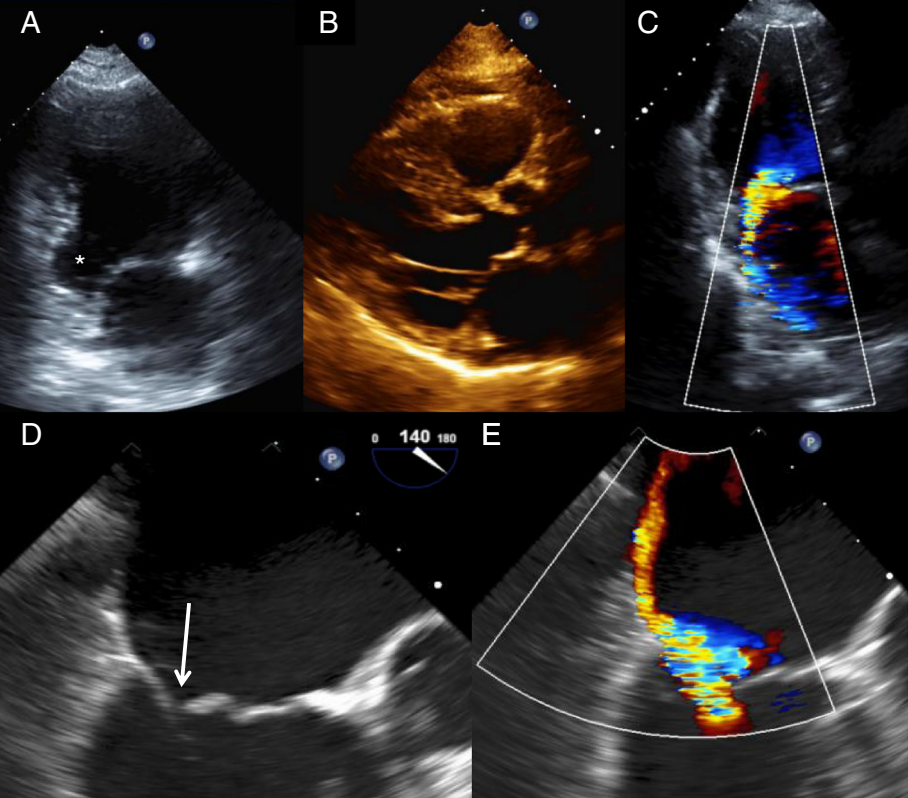

Supplement: MOESM4 [file 9555986]
